# Supplementary material for: Crosstalk between β-catenin and WT1 signalling activity in acute myeloid leukemia
Source: bioRxiv or medRxiv preprint supplement (doi:10.1101/2021.11.06.467095), 2022-02-28
Supplement: Supplementary file [file media-1.pdf]

**Supplementary Table S1. Clinical characteristics of AML/MDS patient diagnostic/relapse samples used in this study.**

| Patient no. | Age (at diagnosis) | Sex | WBC count (x10 <sup>9</sup> /L) | Sample type | Secondary disease (Y/N) | Genetic information                                                                                                   | Other clinical information                                                                                                                       |
|-------------|--------------------|-----|---------------------------------|-------------|-------------------------|-----------------------------------------------------------------------------------------------------------------------|--------------------------------------------------------------------------------------------------------------------------------------------------|
| 1           | 76                 | F   | 389                             | LP          | N                       | Normal karyotype, NPM1 <sup>+</sup> , FLT3 <sup>+</sup>                                                               | n/a                                                                                                                                              |
| 2           | 4                  | M   | n/a                             | BM          | n/a                     | n/a                                                                                                                   | n/a                                                                                                                                              |
| 3           | 10                 | F   | n/a                             | BM          | n/a                     | n/a                                                                                                                   | Deceased                                                                                                                                         |
| 4           | n/a                | n/a | >200                            | PB          | Y                       | n/a                                                                                                                   | Post-allogeneic transplant. M0/1 (previously diagnosed with M3 10 years previously)                                                              |
| 5           | n/a                | n/a | n/a                             | n/a         | n/a                     | n/a                                                                                                                   | n/a                                                                                                                                              |
| 6           | 17                 | M   | n/a                             | BM          | Y                       | n/a                                                                                                                   | Post-BMT for AML following 2 relapses. Deceased                                                                                                  |
| 7           | 6                  | M   | 70.7                            | n/a         | Y                       | n/a                                                                                                                   | Secondary to Ewings Sarcoma. Myelomonocytic morphology. Deceased.                                                                                |
| 8           | 14                 | F   | 7.6                             | BM          | N                       | MLL rearrangement. Karyotype: 46,XX,ins(10;11)(q11.2;q23.1q23.3).ish ins(10;11)?inv(11)(q23.3)(5'MLL+)(q23.1)(3'MLL+) | BMT for high-risk AML. CD33+, MPO+, CD34-, CD117+, TdT+, CD64+, CD11c+, CD15+, CD11b+, NG2+                                                      |
| 9           | 24                 | M   | 256                             | BM          | N                       | 46,XY,inv(16)(p13q22)[16].ish inv(16)(p13)(MYH11+,CBFB+)(q22)(CBFB+,MYH11+)[5]                                        | M4, relapsed, deceased.                                                                                                                          |
| 10          | 17                 | M   | 294                             | BM          | N                       | 46,XY[20]                                                                                                             | Alive, complete remission.                                                                                                                       |
| 11          | 64                 | F   | 13.3                            | BM          | N                       | Normal karyotype                                                                                                      | AML with underlying MDS like changes                                                                                                             |
| 12          | 13                 | F   | 91.9                            | BM          | Y                       |                                                                                                                       | High Risk. Relapsed AML secondary to Rhabdoid tumour. Mixed cellular infiltrate consisting of predominantly monocyte/macrophages (CD14+, CD11c+, |

|    |    |   |      |    |   |                                                                                                                                                        |                                                                                                                                  |
|----|----|---|------|----|---|--------------------------------------------------------------------------------------------------------------------------------------------------------|----------------------------------------------------------------------------------------------------------------------------------|
|    |    |   |      |    |   |                                                                                                                                                        | CD64+, CD34-, CD117-). Deceased                                                                                                  |
| 13 | 4  | F | 2.6  | BM | N | Normal karyotype, NPM1 <sup>+</sup> (exon 12), FLT3 <sup>-</sup>                                                                                       | MRD neg. CD13+, CD33+, CD34+, CD117+, MPO+                                                                                       |
| 14 | 15 | F | 6.5  | BM | N | MLL (KMT2A) rearrangement, t(10;11)(p11-p14,q23), MLL-MLLT10                                                                                           | MRD detected post treatment course 1                                                                                             |
| 15 | 4  | M | 3.2  | BM | N | t(10;11)(p11.2;q23) KMT2A-MLLT10. Cytogenetically cryptic. KMT2A ex8-MLLT10 ex9 or KMT2A ex9-MLLT10 ex10 fusion detected. NPM1-FLT3 <sup>-</sup>       | CD13-, CD33+, CD34-, CD117+/-, CD11c+, CD64+, CD14-, NG2+. High risk cytogenetics. BMT. MRD neg post course 1+2.                 |
| 16 | 14 | F | 14.7 | PB | N | t(8;21)(q22;q22) RUNX-RUNX1T1.<br>46,XX,der(8)?del(8)(q11.2q21.3)?dup(8)(q24.3q21.3)?ins(8;21)(q22;q22.12q22.3),der(21)?ins(8;21)(q22;q22.12q22.3)[10] | CD13+, CD33+, CD34+, CD117+, DR+, MPO+, CD19+. MRD negative post treatment course 1, 2 and EOT                                   |
| 17 | 5  | M | 1.6  | BM | N | n/a                                                                                                                                                    | M5. Deceased.                                                                                                                    |
| 18 | 14 | F | 2.1  | BM | N | 45,XX,-7,add(11)(p11.2)[9]/46,XX[1]                                                                                                                    | 22% Myeloid blasts (CD117+, CD34+/-, CD33+, CD13+, MPO-) + 10% immunophenotypically mature monocytes (CD11c+, CD64+, CD117+) BMT |
| 19 | 8  | F | n/a  | BM | N | n/a                                                                                                                                                    | M4/5. Deceased.                                                                                                                  |
| 20 | 7  | F | 34.4 | BM | Y | MLL rearrangement t(9;11)                                                                                                                              | M5a morphology. BMT following relapse. Deceased                                                                                  |
| 21 | 16 | F | 20.6 | BM | N | Normal karyotype 46,XX[20]                                                                                                                             | CD33+, MPO+, CD34+, CD117+, CD13+, CD14-, CD7+, CD45 weak, CD11c+, TdT-                                                          |
| 22 | 7  | M | 3.5  | BM | N | t(8;21)(q22;q22) RUNX-RUNX1T1<br>45,X,-Y,t(8;21)(q22;q22)[9]/46,XY[1]                                                                                  | 8% myeloid blasts present (CD13+, CD33+, CD34+, CD117+, MPO+)                                                                    |
| 23 | 11 | M | n/a  | BM | N | n/a                                                                                                                                                    | BMT for MDS. Deceased.                                                                                                           |

|    |     |   |       |    |   |                                                                                                                                                                                               |                                                                                                                                                                                                                                                                                                                                                                                                                                                                                                                           |
|----|-----|---|-------|----|---|-----------------------------------------------------------------------------------------------------------------------------------------------------------------------------------------------|---------------------------------------------------------------------------------------------------------------------------------------------------------------------------------------------------------------------------------------------------------------------------------------------------------------------------------------------------------------------------------------------------------------------------------------------------------------------------------------------------------------------------|
| 24 | 13  | F | 14.7  | BM | N | Karyotype:<br>46,XX,der(8)?del(8)(q11.2q21.3)?dup(8)(q24.3q21.3)?ins(8;21)(q22;q22.12q22.3),<br>der(21)?ins(8;21)(q22;q22.12q22.3)[10]<br>CD13+, CD33+, CD34+, CD117+, DR+, MPO+, CD19+.; AML | Only 2 megakaryocytes seen. Erythropoiesis reduced. Prominent eosinophils and eosinophil precursors - c. 12%. No significant monocytoid population. Densely infiltrated with myeloid blasts. Analysis showed an abnormal female clone with a derivative chromosome 8 from a variant 8;21 rearrangement. This abnormality is consistent with a diagnosis of AML (WHO 2008 subtype: AML with t(8;21)(q22;q22); RUNX1-RUNX1T1) and is reported in association with a favourable prognosis.<br><br>Alive, complete remission. |
| 25 | 2   | M | 2.4   | BM | N | t(9;11)(p22;q23), t(11;21)(q23;q8)                                                                                                                                                            | n/a                                                                                                                                                                                                                                                                                                                                                                                                                                                                                                                       |
| 26 | 4mo | M | 5.1   | BM | N | t(9;11)                                                                                                                                                                                       | BMT                                                                                                                                                                                                                                                                                                                                                                                                                                                                                                                       |
| 27 | 7   | F | n/a   | BM | N | MPAL, 46XX, del5q, abnormal 21                                                                                                                                                                | n/a                                                                                                                                                                                                                                                                                                                                                                                                                                                                                                                       |
| 28 | 7mo | F | 168.6 | BM | N | Karyotype: 47,XX,+21[5]/46,XX[5]<br>nuc ish(CBFA2T3, GLIS2)X3(CBFA2T3 con GLIS2x2)[92/150]<br>+ RUNX1.                                                                                        | BMT 24/12/20 due to high-risk genetics.<br><br>CD33+, CD34+,<br>CD117+, MPO+, DR-,<br>CD13+<br><br>Alive, in remission.                                                                                                                                                                                                                                                                                                                                                                                                   |

|    |    |   |      |    |   |                                                   |                                                                                                                                                                        |
|----|----|---|------|----|---|---------------------------------------------------|------------------------------------------------------------------------------------------------------------------------------------------------------------------------|
|    |    |   |      |    |   |                                                   | Received Gemtuzumab Ozogamycin as part of Myechild trial treatment.                                                                                                    |
| 29 | 5  | F | 29.5 | BM | N | Karyotype: 45,X,-X,t(8;21)(q22;q22.1)[8]/46,XX[2] | 7% myeloid blasts (CD13+, CD33+, CD34+, CD117+, MPO+)<br><br>Alive, in remission.<br><br>Received 2 doses of Gemtuzumab Ozogamycin as part of Myechild trial treatment |
| 30 | 76 | F |      | BM |   |                                                   | D45X Polycythaemia vera. M99503, transformation in to MDS.                                                                                                             |

BM = Bone marrow

PB = Peripheral blood

LP = Leukapheresis

MRD = Minimal residual disease

BMT = Bone marrow transplant

AML= Acute myeloid leukemia

MDS= Myelodysplastic syndrome

MPAL= Mixed phenotype acute leukemia

MLL = *Mixed-lineage leukemia*

NPM1 = *Nucleophosmin*

FLT3 = *Fms-like tyrosine kinase 3*

RUNX1 = *Runt-related transcription factor 1*

GATA2 = *GATA Binding Protein 2*

WHO = World Health Organisation

n/a = not available

**Supplementary Table S2. Enrichment values for  $\beta$ -catenin and WT1 following a TMT-labelled assessment of AML Patient #1  $\beta$ -catenin interactome by mass spectrometry.**

| Protein          | Score  | Coverage | # Proteins | # Unique peptides | # Peptides | PSM | Cyt fold change (vs IgG) | Nuc fold change (vs IgG) |
|------------------|--------|----------|------------|-------------------|------------|-----|--------------------------|--------------------------|
| $\beta$ -Catenin | 535.53 | 64.08    | 10         | 33                | 40         | 175 | 8.03                     | 4.159                    |
| WT1              | 2.51   | 4.49     | 5          | 1                 | 1          | 1   | 0.889                    | 1.74                     |

**Score:** Displays the protein score, which is the sum of the scores of the individual peptides. For Sequest results, the score is the sum of all peptide Xcorr values above the specified score threshold. The score threshold is calculated as follows:

$$0.8 + \text{peptide\_charge} \times \text{peptide\_relevance\_factor}$$

where `peptide_relevance_factor` is an advanced parameter of the SEQUEST or Sequest HT node in the "Protein Scoring Option" category with a default value of 0.4. For each spectrum, only the highest-scoring match is used.

For each spectrum and sequence, the Proteome Discoverer application uses only the highest scored peptide. When it performs a search using dynamic modifications, one spectrum might have multiple matches because of permutations of the modification site.

For Mascot results, the score is:

– Standard score, which is the cumulative protein score based on summing the ion scores of the unique peptides identified for that protein. If a peptide was redundantly identified, only the highest-scoring peptide is used.

–or–

– MudPIT score, which is the sum of the "excess of ions" score over the homology or identity threshold for each spectrum plus the average threshold. For MudPIT scoring, the score for each peptide is not its absolute score but the amount that it is above the threshold. Therefore, peptides with a score below the threshold do not contribute to the score. For each peptide, the threshold is the homology threshold, if it exists; otherwise, it is the identity threshold. By default, the Proteome Discoverer application automatically switches between the standard and the MudPIT score to calculate the protein score in the Mascot node results. It automatically uses the MudPIT score when the number of queries divided by the number of FASTA database entries exceeds 0.001.

**Coverage:** Displays by default the percentage of the protein sequence covered by identified peptides

**Proteins:** Displays the number of identified proteins in the protein group of a master protein

**Unique Peptides:** Displays the number of peptide sequences unique to a protein group

**Peptides:** Displays the number of distinct peptide sequences in the protein group

**PSMs:** Displays the total number of identified peptide sequences (peptide spectrum matches) for the protein, including those redundantly identified

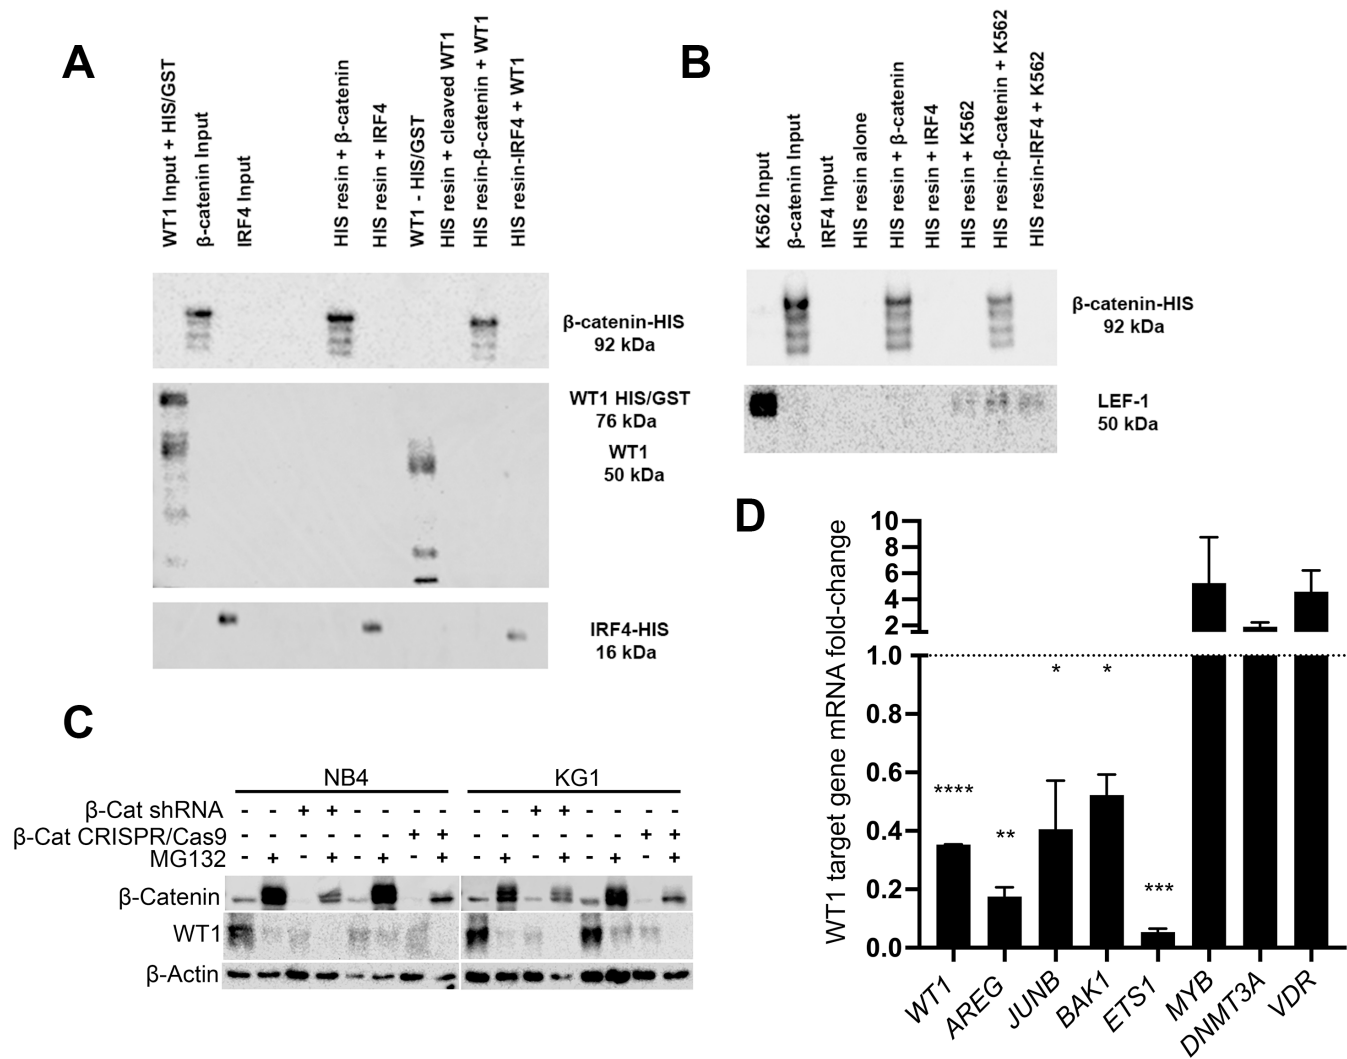

**Supplementary Figure S1. A)** Immunoblot showing purified WT1 (HIS/GST tagged, and non-tagged) abundance in  $\beta$ -catenin-HIS or IRF4-HIS (negative control) resin columns. **B)** Immunoblot showing level of  $\beta$ -catenin or positive control LEF-1 (derived from whole cell K562 lysates) present in HIS resin  $\beta$ -catenin and IRF4 containing lanes. LEF-1 is a known interactor of  $\beta$ -catenin and confirms recombinant  $\beta$ -catenin protein can still bind established partners. **C)** Immunoblot showing protein level of  $\beta$ -catenin and WT1 in NB4 and KG1 cells +/-  $\beta$ -catenin shRNA, +/-  $\beta$ -catenin CRISPR/Cas9 following 16 hours incubation with 1 $\mu$ M proteasome inhibitor MG132.  $\beta$ -Actin detection indicates protein loading. **D)** Summary graph showing fold change in mRNA expression of genes previously identified as WT1 target genes, in KG-1 cells by qRT-PCR. Fold change is in response to knockdown of WT1 using WT1 shRNA relative to expression in non-targeted shRNA control (dashed line). Expression was normalised to the housekeeping gene  $\beta$ -actin (*ACTB*). All data represents mean  $\pm$  1 s.d ( $n=3$ ). Statistical significance is denoted by \* $P<0.05$ , \*\* $P<0.005$ , \*\*\* $P<0.0005$  and \*\*\*\* $P<0.0001$  as deduced by a one-sample t-test.
